# Supplementary material for: Muon spin spectroscopy of ferrocene: characterization of muoniated ferrocenyl radicals
Source: Royal Society of Chemistry journal article supplement (doi:10.1039/c4cp00618f), 2014-01-01
Supplement: c4cp00618f1.pdf [file c4cp00618f1.pdf]

## Calculations on ferrocene the H/Mu adducts of ferrocene

All calculations were performed with the Gaussian 09 package of programs along with the UB3LYP functional and the 6-311++g(2d,p) basis set. Frequency calculations were performed on the optimized structures and the reported energies are the sum of electronic and zero-point energies.

### Ferrocene with eclipsed Cp rings

```
-----
```

| Center<br>Number | Atomic<br>Number | Atomic<br>Type | Coordinates (Angstroms) |           |           |
|------------------|------------------|----------------|-------------------------|-----------|-----------|
|                  |                  |                | X                       | Y         | Z         |
| 1                | 6                | 0              | -1.690393               | 0.539183  | 1.084476  |
| 2                | 6                | 0              | -1.690820               | 1.197951  | -0.177552 |
| 3                | 6                | 0              | -1.691573               | 0.201186  | -1.194004 |
| 4                | 6                | 0              | -1.691467               | -1.073572 | -0.560185 |
| 5                | 6                | 0              | -1.690802               | -0.864695 | 0.848017  |
| 6                | 1                | 0              | -1.672327               | 1.019435  | 2.050226  |
| 7                | 1                | 0              | -1.673030               | 2.264906  | -0.335705 |
| 8                | 1                | 0              | -1.674775               | 0.380537  | -2.257562 |
| 9                | 1                | 0              | -1.674357               | -2.029735 | -1.059454 |
| 10               | 1                | 0              | -1.673018               | -1.634861 | 1.603153  |
| 11               | 26               | 0              | -0.000089               | -0.000126 | -0.000517 |
| 12               | 6                | 0              | 1.690238                | 0.535249  | 1.086566  |
| 13               | 6                | 0              | 1.690845                | 1.198642  | -0.173023 |
| 14               | 6                | 0              | 1.691684                | 0.205643  | -1.193144 |
| 15               | 6                | 0              | 1.691694                | -1.071406 | -0.564078 |
| 16               | 6                | 0              | 1.690769                | -0.867752 | 0.844893  |
| 17               | 1                | 0              | 1.672071                | 1.011896  | 2.054107  |
| 18               | 1                | 0              | 1.673078                | 2.266159  | -0.327355 |
| 19               | 1                | 0              | 1.675185                | 0.388876  | -2.256045 |
| 20               | 1                | 0              | 1.675364                | -2.025753 | -1.066851 |
| 21               | 1                | 0              | 1.673068                | -1.640744 | 1.597132  |

```
-----
```

Sum of electronic and zero-point Energies= -1650.743848

## H/Mu addition at Cp ring with staggered Cp rings

| Center Number | Atomic Number | Atomic Type | Coordinates (Angstroms) |           |           |
|---------------|---------------|-------------|-------------------------|-----------|-----------|
|               |               |             | X                       | Y         | Z         |
| 1             | 6             | 0           | -2.016354               | 1.074848  | 0.006117  |
| 2             | 6             | 0           | -1.858529               | 0.262262  | -1.140428 |
| 3             | 6             | 0           | -1.674845               | -1.088874 | -0.716254 |
| 4             | 6             | 0           | -1.675679               | -1.096834 | 0.704564  |
| 5             | 6             | 0           | -1.859569               | 0.249363  | 1.143581  |
| 6             | 1             | 0           | -2.154678               | 2.145132  | 0.012200  |
| 7             | 1             | 0           | -1.889481               | 0.600660  | -2.164892 |
| 8             | 1             | 0           | -1.575060               | -1.945405 | -1.364466 |
| 9             | 1             | 0           | -1.576448               | -1.960563 | 1.343250  |
| 10            | 1             | 0           | -1.891447               | 0.576429  | 2.171692  |
| 11            | 26            | 0           | -0.013413               | 0.013880  | 0.000545  |
| 12            | 6             | 0           | 1.550881                | 1.109814  | 0.713247  |
| 13            | 6             | 0           | 1.550474                | 1.109760  | -0.713083 |
| 14            | 6             | 0           | 1.682186                | -0.235748 | -1.142389 |
| 15            | 6             | 0           | 2.267770                | -1.060474 | -0.000037 |
| 16            | 6             | 0           | 1.682807                | -0.235745 | 1.142660  |
| 17            | 1             | 0           | 1.398689                | 1.973068  | 1.344557  |
| 18            | 1             | 0           | 1.397816                | 1.973018  | -1.344265 |
| 19            | 1             | 0           | 1.724345                | -0.534374 | -2.180515 |
| 20            | 1             | 0           | 1.921127                | -2.096927 | 0.000015  |
| 21            | 1             | 0           | 1.726152                | -0.534140 | 2.180804  |
| 22            | 1             | 0           | 3.372852                | -1.088017 | -0.000421 |

Exo Mu (H22) adduct: Sum of electronic and zero-point Energies = -1651.273089 Hartrees. There are no imaginary frequencies, which indicate this is a minimum energy geometry.

Endo Mu (H20) adduct: Sum of electronic and zero-point Energies = -1651.272054 Hartrees. There are no imaginary frequencies, which indicate this is a minimum energy geometry.

### Isotropic Fermi Contact Couplings

| Atom    | a.u.     | MegaHertz | Gauss    | 10(-4) cm-1 |
|---------|----------|-----------|----------|-------------|
| 1 C(13) | 0.00344  | 3.86640   | 1.37963  | 1.28969     |
| 2 C(13) | 0.00121  | 1.36188   | 0.48595  | 0.45427     |
| 3 C(13) | -0.00007 | -0.07884  | -0.02813 | -0.02630    |
| 4 C(13) | 0.00002  | 0.01959   | 0.00699  | 0.00653     |
| 5 C(13) | 0.00118  | 1.32734   | 0.47363  | 0.44275     |

|           |          |           |          |          |
|-----------|----------|-----------|----------|----------|
| 6 H(1)    | 0.00006  | 0.26430   | 0.09431  | 0.08816  |
| 7 H(1)    | -0.00008 | -0.36858  | -0.13152 | -0.12294 |
| 8 H(1)    | 0.00034  | 1.50703   | 0.53774  | 0.50269  |
| 9 H(1)    | 0.00034  | 1.51639   | 0.54109  | 0.50581  |
| 10 H(1)   | -0.00008 | -0.35063  | -0.12511 | -0.11696 |
| 11 Fe(57) | -0.07019 | -10.18013 | -3.63252 | -3.39573 |
| 12 C(13)  | 0.00213  | 2.39382   | 0.85417  | 0.79849  |
| 13 C(13)  | 0.00214  | 2.40422   | 0.85789  | 0.80196  |
| 14 C(13)  | -0.00824 | -9.26864  | -3.30728 | -3.09169 |
| 15 C(13)  | 0.01817  | 20.42309  | 7.28747  | 6.81241  |
| 16 C(13)  | -0.00825 | -9.27881  | -3.31091 | -3.09508 |
| 17 H(1)   | 0.00052  | 2.32480   | 0.82955  | 0.77547  |
| 18 H(1)   | 0.00052  | 2.31517   | 0.82611  | 0.77226  |
| 19 H(1)   | 0.00058  | 2.59470   | 0.92585  | 0.86550  |
| 20 H(1)   | -0.00023 | -1.02444  | -0.36555 | -0.34172 |
| 21 H(1)   | 0.00058  | 2.58662   | 0.92297  | 0.86280  |
| 22 H(1)   | 0.00145  | 6.46758   | 2.30779  | 2.15735  |

---

Anisotropic Spin Dipole Couplings in Principal Axis System

---

| Atom    | a.u. | MegaHertz | Gauss  | 10(-4) | cm-1   | Axes    |         |         |
|---------|------|-----------|--------|--------|--------|---------|---------|---------|
| 1 C(13) | Baa  | -0.0179   | -2.396 | -0.855 | -0.799 | 0.6433  | 0.7656  | 0.0078  |
|         | Bbb  | -0.0079   | -1.065 | -0.380 | -0.355 | -0.0012 | -0.0093 | 1.0000  |
|         | Bcc  | 0.0258    | 3.461  | 1.235  | 1.155  | 0.7656  | -0.6433 | -0.0051 |
| 2 C(13) | Baa  | -0.0220   | -2.947 | -1.051 | -0.983 | -0.6852 | 0.1043  | 0.7209  |
|         | Bbb  | -0.0040   | -0.531 | -0.190 | -0.177 | -0.0299 | 0.9848  | -0.1709 |
|         | Bcc  | 0.0259    | 3.478  | 1.241  | 1.160  | 0.7278  | 0.1387  | 0.6716  |
| 3 C(13) | Baa  | -0.0231   | -3.095 | -1.104 | -1.032 | 0.8047  | -0.3838 | -0.4529 |
|         | Bbb  | -0.0041   | -0.551 | -0.196 | -0.184 | 0.1438  | -0.6141 | 0.7760  |
|         | Bcc  | 0.0272    | 3.646  | 1.301  | 1.216  | 0.5760  | 0.6896  | 0.4390  |
| 4 C(13) | Baa  | -0.0229   | -3.072 | -1.096 | -1.025 | 0.7964  | -0.4005 | 0.4531  |
|         | Bbb  | -0.0046   | -0.622 | -0.222 | -0.208 | -0.1435 | 0.6027  | 0.7849  |
|         | Bcc  | 0.0275    | 3.694  | 1.318  | 1.232  | 0.5875  | 0.6902  | -0.4225 |
| 5 C(13) | Baa  | -0.0218   | -2.932 | -1.046 | -0.978 | 0.6859  | -0.1104 | 0.7193  |
|         | Bbb  | -0.0039   | -0.529 | -0.189 | -0.176 | -0.0270 | 0.9839  | 0.1767  |
|         | Bcc  | 0.0258    | 3.461  | 1.235  | 1.154  | 0.7272  | 0.1406  | -0.6719 |
| 6 H(1)  | Baa  | -0.0068   | -3.628 | -1.295 | -1.210 | 0.6877  | 0.7260  | 0.0036  |
|         | Bbb  | -0.0055   | -2.909 | -1.038 | -0.970 | 0.0005  | -0.0055 | 1.0000  |
|         | Bcc  | 0.0123    | 6.537  | 2.333  | 2.181  | 0.7260  | -0.6876 | -0.0041 |
| 7 H(1)  | Baa  | -0.0071   | -3.794 | -1.354 | -1.265 | 0.7687  | 0.0681  | -0.6360 |
|         | Bbb  | -0.0059   | -3.167 | -1.130 | -1.056 | 0.0681  | 0.9799  | 0.1873  |
|         | Bcc  | 0.0130    | 6.961  | 2.484  | 2.322  | 0.6360  | -0.1873 | 0.7486  |

|           |     |         |         |         |        |         |         |         |
|-----------|-----|---------|---------|---------|--------|---------|---------|---------|
| 8 H(1)    | Baa | -0.0073 | -3.882  | -1.385  | -1.295 | 0.7774  | -0.6115 | -0.1473 |
|           | Bbb | -0.0063 | -3.373  | -1.204  | -1.125 | -0.2119 | -0.4752 | 0.8540  |
|           | Bcc | 0.0136  | 7.255   | 2.589   | 2.420  | 0.5922  | 0.6327  | 0.4990  |
| 9 H(1)    | Baa | -0.0072 | -3.864  | -1.379  | -1.289 | 0.7661  | -0.6352 | 0.0979  |
|           | Bbb | -0.0064 | -3.403  | -1.214  | -1.135 | 0.2496  | 0.4344  | 0.8654  |
|           | Bcc | 0.0136  | 7.268   | 2.593   | 2.424  | 0.5923  | 0.6386  | -0.4913 |
| 10 H(1)   | Baa | -0.0071 | -3.794  | -1.354  | -1.266 | 0.7683  | 0.0674  | 0.6366  |
|           | Bbb | -0.0059 | -3.159  | -1.127  | -1.054 | 0.0636  | 0.9815  | -0.1806 |
|           | Bcc | 0.0130  | 6.953   | 2.481   | 2.319  | -0.6370 | 0.1793  | 0.7498  |
| 11 Fe(57) | Baa | -1.6793 | -29.074 | -10.374 | -9.698 | 0.9390  | 0.3438  | 0.0003  |
|           | Bbb | -0.2309 | -3.997  | -1.426  | -1.333 | -0.0001 | -0.0006 | 1.0000  |
|           | Bcc | 1.9102  | 33.071  | 11.801  | 11.031 | -0.3438 | 0.9390  | 0.0005  |
| 12 C(13)  | Baa | -0.0402 | -5.398  | -1.926  | -1.800 | 0.9481  | 0.0452  | -0.3147 |
|           | Bbb | 0.0122  | 1.632   | 0.582   | 0.544  | -0.2487 | 0.7221  | -0.6455 |
|           | Bcc | 0.0281  | 3.766   | 1.344   | 1.256  | 0.1981  | 0.6903  | 0.6959  |
| 13 C(13)  | Baa | -0.0402 | -5.391  | -1.924  | -1.798 | 0.9481  | 0.0451  | 0.3146  |
|           | Bbb | 0.0121  | 1.628   | 0.581   | 0.543  | -0.2485 | 0.7223  | 0.6454  |
|           | Bcc | 0.0280  | 3.762   | 1.343   | 1.255  | -0.1981 | -0.6901 | 0.6961  |
| 14 C(13)  | Baa | -0.0741 | -9.940  | -3.547  | -3.316 | 0.9114  | 0.4115  | -0.0052 |
|           | Bbb | 0.0310  | 4.156   | 1.483   | 1.386  | 0.2115  | -0.4576 | 0.8636  |
|           | Bcc | 0.0431  | 5.784   | 2.064   | 1.929  | -0.3530 | 0.7882  | 0.5041  |
| 15 C(13)  | Baa | -0.0147 | -1.972  | -0.703  | -0.658 | -0.0001 | -0.0002 | 1.0000  |
|           | Bbb | -0.0130 | -1.744  | -0.622  | -0.582 | 0.3457  | 0.9383  | 0.0002  |
|           | Bcc | 0.0277  | 3.716   | 1.326   | 1.239  | 0.9383  | -0.3457 | 0.0000  |
| 16 C(13)  | Baa | -0.0741 | -9.948  | -3.550  | -3.318 | 0.9115  | 0.4112  | 0.0045  |
|           | Bbb | 0.0310  | 4.162   | 1.485   | 1.388  | -0.2112 | 0.4589  | 0.8630  |
|           | Bcc | 0.0431  | 5.786   | 2.065   | 1.930  | -0.3528 | 0.7876  | -0.5051 |
| 17 H(1)   | Baa | -0.0096 | -5.146  | -1.836  | -1.716 | 0.7879  | -0.3810 | -0.4838 |
|           | Bbb | -0.0044 | -2.343  | -0.836  | -0.782 | 0.1441  | -0.6498 | 0.7464  |
|           | Bcc | 0.0140  | 7.489   | 2.672   | 2.498  | 0.5987  | 0.6578  | 0.4570  |
| 18 H(1)   | Baa | -0.0096 | -5.145  | -1.836  | -1.716 | 0.7882  | -0.3809 | 0.4834  |
|           | Bbb | -0.0044 | -2.345  | -0.837  | -0.782 | -0.1438 | 0.6498  | 0.7464  |
|           | Bcc | 0.0140  | 7.491   | 2.673   | 2.499  | 0.5984  | 0.6578  | -0.4574 |
| 19 H(1)   | Baa | -0.0099 | -5.279  | -1.884  | -1.761 | 0.6711  | 0.4214  | 0.6099  |
|           | Bbb | -0.0018 | -0.935  | -0.334  | -0.312 | -0.2006 | 0.8953  | -0.3978 |
|           | Bcc | 0.0116  | 6.214   | 2.217   | 2.073  | 0.7137  | -0.1446 | -0.6854 |
| 20 H(1)   | Baa | -0.0089 | -4.770  | -1.702  | -1.591 | 0.0009  | 0.0007  | 1.0000  |
|           | Bbb | -0.0071 | -3.805  | -1.358  | -1.269 | 0.7053  | 0.7089  | -0.0011 |
|           | Bcc | 0.0161  | 8.575   | 3.060   | 2.860  | 0.7089  | -0.7053 | -0.000  |
| 21 H(1)   | Baa | -0.0099 | -5.277  | -1.883  | -1.760 | 0.6707  | 0.4210  | -0.6107 |
|           | Bbb | -0.0017 | -0.932  | -0.333  | -0.311 | -0.2000 | 0.8954  | 0.3977  |
|           | Bcc | 0.0116  | 6.209   | 2.215   | 2.071  | 0.7143  | -0.1446 | 0.6847  |

|         |     |         |        |        |        |        |         |         |
|---------|-----|---------|--------|--------|--------|--------|---------|---------|
|         | Baa | -0.0040 | -2.133 | -0.761 | -0.712 | 0.0004 | 0.0006  | 1.0000  |
| 22 H(1) | Bbb | -0.0034 | -1.793 | -0.640 | -0.598 | 0.1727 | 0.9850  | -0.0006 |
|         | Bcc | 0.0074  | 3.926  | 1.401  | 1.310  | 0.9850 | -0.1727 | -0.0003 |

---

## H/Mu addition at Cp ring with eclipsed Cp rings

| Center Number | Atomic Number | Atomic Type | Coordinates (Angstroms) |           |           |
|---------------|---------------|-------------|-------------------------|-----------|-----------|
|               |               |             | X                       | Y         | Z         |
| 1             | 6             | 0           | -1.895039               | 0.883370  | 0.702849  |
| 2             | 6             | 0           | -1.893160               | 0.877961  | -0.710986 |
| 3             | 6             | 0           | -1.775534               | -0.476286 | -1.145086 |
| 4             | 6             | 0           | -1.734747               | -1.304938 | 0.004443  |
| 5             | 6             | 0           | -1.777773               | -0.467283 | 1.147355  |
| 6             | 1             | 0           | -1.963773               | 1.753090  | 1.337628  |
| 7             | 1             | 0           | -1.960842               | 1.742795  | -1.352524 |
| 8             | 1             | 0           | -1.746229               | -0.811772 | -2.170027 |
| 9             | 1             | 0           | -1.645016               | -2.380744 | 0.008858  |
| 10            | 1             | 0           | -1.749586               | -0.794893 | 2.174883  |
| 11            | 26            | 0           | -0.012333               | 0.008019  | -0.000083 |
| 12            | 6             | 0           | 1.552524                | 1.093170  | 0.715179  |
| 13            | 6             | 0           | 1.552808                | 1.094533  | -0.712690 |
| 14            | 6             | 0           | 1.680051                | -0.250070 | -1.143653 |
| 15            | 6             | 0           | 2.255957                | -1.081202 | -0.000686 |
| 16            | 6             | 0           | 1.679585                | -0.252276 | 1.143626  |
| 17            | 1             | 0           | 1.406540                | 1.957213  | 1.346703  |
| 18            | 1             | 0           | 1.407052                | 1.959770  | -1.342628 |
| 19            | 1             | 0           | 1.722539                | -0.547972 | -2.181947 |
| 20            | 1             | 0           | 1.899551                | -2.114611 | -0.001731 |
| 21            | 1             | 0           | 1.721717                | -0.552148 | 2.181366  |
| 22            | 1             | 0           | 3.360661                | -1.121102 | -0.000541 |

Exo Mu (H22) adduct: Sum of electronic and zero-point Energies = -1651.272162 Hartrees. There is one imaginary frequency, which indicates it is a saddle point.

Endo Mu (H20) adduct: Sum of electronic and zero-point Energies = -1651.271126 Hartrees. There is one imaginary frequency, which indicates it is a saddle point.

### Isotropic Fermi Contact Couplings

| Atom    | a.u.     | MegaHertz | Gauss    | 10(-4) cm-1 |
|---------|----------|-----------|----------|-------------|
| 1 C(13) | 0.00238  | 2.67374   | 0.95406  | 0.89187     |
| 2 C(13) | 0.00237  | 2.66396   | 0.95057  | 0.88860     |
| 3 C(13) | -0.00208 | -2.33479  | -0.83311 | -0.77880    |
| 4 C(13) | 0.00444  | 4.99657   | 1.78290  | 1.66668     |
| 5 C(13) | -0.00204 | -2.28796  | -0.81640 | -0.76318    |
| 6 H(1)  | -0.00008 | -0.36364  | -0.12975 | -0.12130    |

|           |          |           |          |          |
|-----------|----------|-----------|----------|----------|
| 7 H(1)    | -0.00009 | -0.38921  | -0.13888 | -0.12983 |
| 8 H(1)    | 0.00026  | 1.14429   | 0.40831  | 0.38169  |
| 9 H(1)    | 0.00017  | 0.74183   | 0.26470  | 0.24745  |
| 10 H(1)   | 0.00025  | 1.13117   | 0.40363  | 0.37732  |
| 11 Fe(57) | -0.07592 | -11.01210 | -3.92939 | -3.67324 |
| 12 C(13)  | 0.00192  | 2.15999   | 0.77074  | 0.72050  |
| 13 C(13)  | 0.00193  | 2.16489   | 0.77249  | 0.72213  |
| 14 C(13)  | -0.00704 | -7.91429  | -2.82401 | -2.63992 |
| 15 C(13)  | 0.01942  | 21.83212  | 7.79024  | 7.28241  |
| 16 C(13)  | -0.00704 | -7.91560  | -2.82448 | -2.64036 |
| 17 H(1)   | 0.00050  | 2.21404   | 0.79003  | 0.73853  |
| 18 H(1)   | 0.00049  | 2.20229   | 0.78583  | 0.73460  |
| 19 H(1)   | 0.00043  | 1.91720   | 0.68411  | 0.63951  |
| 20 H(1)   | 0.00030  | 1.36307   | 0.48638  | 0.45467  |
| 21 H(1)   | 0.00043  | 1.91678   | 0.68395  | 0.63937  |
| 22 H(1)   | 0.00355  | 15.88590  | 5.66849  | 5.29897  |

---

Anisotropic Spin Dipole Couplings in Principal Axis System

---

|         | Atom | a.u.    | MegaHertz | Gauss  | 10 <sup>(-4)</sup> cm <sup>-1</sup> | Axes    |         |         |
|---------|------|---------|-----------|--------|-------------------------------------|---------|---------|---------|
| 1 C(13) | Baa  | -0.0226 | -3.035    | -1.083 | -1.012                              | 0.6665  | 0.3543  | 0.6559  |
|         | Bbb  | -0.0042 | -0.557    | -0.199 | -0.186                              | -0.0187 | 0.8875  | -0.4604 |
|         | Bcc  | 0.0268  | 3.592     | 1.282  | 1.198                               | 0.7453  | -0.2946 | -0.5981 |
| 2 C(13) | Baa  | -0.0227 | -3.044    | -1.086 | -1.015                              | 0.6648  | 0.3475  | -0.6613 |
|         | Bbb  | -0.0042 | -0.564    | -0.201 | -0.188                              | -0.0211 | 0.8936  | 0.4483  |
|         | Bcc  | 0.0269  | 3.608     | 1.287  | 1.204                               | 0.7467  | -0.2841 | 0.6014  |
| 3 C(13) | Baa  | -0.0285 | -3.822    | -1.364 | -1.275                              | 0.9227  | 0.0511  | -0.3821 |
|         | Bbb  | 0.0051  | 0.682     | 0.243  | 0.227                               | -0.1099 | 0.9849  | -0.1337 |
|         | Bcc  | 0.0234  | 3.140     | 1.120  | 1.047                               | 0.3695  | 0.1654  | 0.9144  |
| 4 C(13) | Baa  | -0.0345 | -4.624    | -1.650 | -1.543                              | -0.0023 | 0.0047  | 1.0000  |
|         | Bbb  | -0.0318 | -4.272    | -1.524 | -1.425                              | -0.4301 | 0.9028  | -0.0052 |
|         | Bcc  | 0.0663  | 8.896     | 3.174  | 2.968                               | 0.9028  | 0.4301  | 0.0000  |
| 5 C(13) | Baa  | -0.0282 | -3.778    | -1.348 | -1.260                              | 0.9211  | 0.0502  | 0.3860  |
|         | Bbb  | 0.0049  | 0.652     | 0.233  | 0.217                               | -0.1079 | 0.9857  | 0.1291  |
|         | Bcc  | 0.0233  | 3.126     | 1.115  | 1.043                               | -0.3740 | -0.1606 | 0.9134  |
| 6 H(1)  | Baa  | -0.0069 | -3.667    | -1.308 | -1.223                              | 0.7513  | 0.4715  | 0.4618  |
|         | Bbb  | -0.0058 | -3.096    | -1.105 | -1.033                              | -0.0398 | -0.6660 | 0.7449  |
|         | Bcc  | 0.0127  | 6.763     | 2.413  | 2.256                               | 0.6587  | -0.5780 | -0.4816 |
| 7 H(1)  | Baa  | -0.0069 | -3.666    | -1.308 | -1.223                              | 0.7521  | 0.4615  | -0.4706 |
|         | Bbb  | -0.0058 | -3.107    | -1.109 | -1.036                              | 0.0459  | 0.6757  | 0.7358  |
|         | Bcc  | 0.0127  | 6.772     | 2.417  | 2.259                               | 0.6575  | -0.5749 | 0.4870  |
| 8 H(1)  | Baa  | -0.0081 | -4.295    | -1.533 | -1.433                              | 0.7692  | -0.1316 | -0.6253 |
|         | Bbb  | -0.0041 | -2.178    | -0.777 | -0.727                              | -0.0507 | 0.9629  | -0.2651 |
|         | Bcc  | 0.0121  | 6.473     | 2.310  | 2.159                               | 0.6370  | 0.2356  | 0.7340  |

|           |     |         |         |        |        |         |         |         |
|-----------|-----|---------|---------|--------|--------|---------|---------|---------|
|           | Baa | -0.0104 | -5.535  | -1.975 | -1.846 | -0.0014 | 0.0053  | 1.0000  |
| 9 H(1)    | Bbb | -0.0042 | -2.241  | -0.800 | -0.748 | 0.8068  | -0.5909 | 0.0043  |
|           | Bcc | 0.0146  | 7.776   | 2.775  | 2.594  | 0.5909  | 0.8068  | -0.0035 |
|           | Baa | -0.0080 | -4.287  | -1.530 | -1.430 | 0.7689  | -0.1267 | 0.6266  |
| 10 H(1)   | Bbb | -0.0041 | -2.187  | -0.781 | -0.730 | -0.0514 | 0.9647  | 0.2582  |
|           | Bcc | 0.0121  | 6.474   | 2.310  | 2.160  | -0.6373 | -0.2307 | 0.7353  |
|           | Baa | -1.6155 | -27.969 | -9.980 | -9.329 | 0.9383  | 0.3459  | 0.0009  |
| 11 Fe(57) | Bbb | -0.2666 | -4.615  | -1.647 | -1.539 | -0.0004 | -0.0015 | 1.0000  |
|           | Bcc | 1.8821  | 32.584  | 11.627 | 10.869 | -0.3459 | 0.9383  | 0.0013  |
|           | Baa | -0.0400 | -5.367  | -1.915 | -1.790 | 0.9534  | 0.0403  | -0.2988 |
| 12 C(13)  | Bbb | 0.0120  | 1.606   | 0.573  | 0.536  | -0.2411 | 0.6971  | -0.6753 |
|           | Bcc | 0.0280  | 3.761   | 1.342  | 1.255  | 0.1811  | 0.7159  | 0.6743  |
|           | Baa | -0.0399 | -5.359  | -1.912 | -1.788 | 0.9532  | 0.0398  | 0.2998  |
| 13 C(13)  | Bbb | 0.0119  | 1.602   | 0.572  | 0.534  | -0.2417 | 0.6961  | 0.6760  |
|           | Bcc | 0.0280  | 3.757   | 1.341  | 1.253  | 0.1818  | 0.7168  | -0.6731 |
|           | Baa | -0.0621 | -8.329  | -2.972 | -2.778 | 0.8858  | 0.4640  | 0.0095  |
| 14 C(13)  | Bbb | 0.0245  | 3.283   | 1.171  | 1.095  | 0.2068  | -0.4129 | 0.8870  |
|           | Bcc | 0.0376  | 5.046   | 1.800  | 1.683  | -0.4155 | 0.7837  | 0.4617  |
|           | Baa | -0.0149 | -2.000  | -0.714 | -0.667 | -0.0007 | -0.0012 | 1.0000  |
| 15 C(13)  | Bbb | -0.0132 | -1.766  | -0.630 | -0.589 | 0.3453  | 0.9385  | 0.0013  |
|           | Bcc | 0.0281  | 3.766   | 1.344  | 1.256  | 0.9385  | -0.3453 | 0.0002  |
|           | Baa | -0.0621 | -8.336  | -2.974 | -2.781 | 0.8860  | 0.4636  | -0.0080 |
| 16 C(13)  | Bbb | 0.0245  | 3.289   | 1.174  | 1.097  | -0.2074 | 0.4115  | 0.8875  |
|           | Bcc | 0.0376  | 5.047   | 1.801  | 1.684  | -0.4148 | 0.7846  | -0.4608 |
|           | Baa | -0.0094 | -5.008  | -1.787 | -1.671 | 0.7896  | -0.3757 | -0.4853 |
| 17 H(1)   | Bbb | -0.0042 | -2.247  | -0.802 | -0.750 | 0.1500  | -0.6486 | 0.7462  |
|           | Bcc | 0.0136  | 7.255   | 2.589  | 2.420  | 0.5951  | 0.6620  | 0.4557  |
|           | Baa | -0.0094 | -5.007  | -1.787 | -1.670 | 0.7893  | -0.3763 | 0.4851  |
| 18 H(1)   | Bbb | -0.0042 | -2.250  | -0.803 | -0.750 | -0.1506 | 0.6472  | 0.7473  |
|           | Bcc | 0.0136  | 7.257   | 2.589  | 2.421  | 0.5952  | 0.6629  | -0.4542 |
|           | Baa | -0.0094 | -5.022  | -1.792 | -1.675 | 0.6804  | 0.4496  | 0.5787  |
| 19 H(1)   | Bbb | -0.0024 | -1.280  | -0.457 | -0.427 | -0.2429 | 0.8834  | -0.4007 |
|           | Bcc | 0.0118  | 6.301   | 2.248  | 2.102  | -0.6914 | 0.1320  | 0.7103  |
|           | Baa | -0.0091 | -4.860  | -1.734 | -1.621 | 0.0006  | -0.0001 | 1.0000  |
| 20 H(1)   | Bbb | -0.0069 | -3.689  | -1.316 | -1.231 | 0.7187  | 0.6953  | -0.0004 |
|           | Bcc | 0.0160  | 8.549   | 3.050  | 2.852  | -0.6953 | 0.7187  | 0.0005  |
|           | Baa | -0.0094 | -5.022  | -1.792 | -1.675 | 0.6806  | 0.4504  | -0.5779 |
| 21 H(1)   | Bbb | -0.0024 | -1.278  | -0.456 | -0.426 | -0.2427 | 0.8828  | 0.4022  |
|           | Bcc | 0.0118  | 6.300   | 2.248  | 2.101  | 0.6913  | -0.1334 | 0.7101  |
|           | Baa | -0.0040 | -2.131  | -0.760 | -0.711 | 0.0000  | 0.0003  | 1.0000  |
| 22 H(1)   | Bbb | -0.0034 | -1.823  | -0.651 | -0.608 | 0.1780  | 0.9840  | -0.0003 |
|           | Bcc | 0.0074  | 3.954   | 1.411  | 1.319  | 0.9840  | -0.1780 | 0.0000  |



## H/Mu addition at Cp ring with planar C<sub>5</sub>H<sub>5</sub>Mu ring and eclipsed Cp rings

| Center Number | Atomic Number | Atomic Type | Coordinates (Angstroms) |           |           |
|---------------|---------------|-------------|-------------------------|-----------|-----------|
|               |               |             | X                       | Y         | Z         |
| 1             | 6             | 0           | -1.839562               | 0.924148  | 0.703590  |
| 2             | 6             | 0           | -1.838687               | 0.922128  | -0.706605 |
| 3             | 6             | 0           | -1.767001               | -0.438011 | -1.145811 |
| 4             | 6             | 0           | -1.769244               | -1.271094 | 0.001543  |
| 5             | 6             | 0           | -1.767710               | -0.434660 | 1.146503  |
| 6             | 1             | 0           | -1.870656               | 1.794492  | 1.340585  |
| 7             | 1             | 0           | -1.869278               | 1.790682  | -1.346074 |
| 8             | 1             | 0           | -1.758780               | -0.770304 | -2.172402 |
| 9             | 1             | 0           | -1.732668               | -2.350169 | 0.003194  |
| 10            | 1             | 0           | -1.759739               | -0.764142 | 2.174008  |
| 11            | 26            | 0           | -0.002786               | -0.013024 | -0.000049 |
| 12            | 6             | 0           | 1.555322                | 1.081982  | 0.719333  |
| 13            | 6             | 0           | 1.555243                | 1.084814  | -0.715248 |
| 14            | 6             | 0           | 1.802948                | -0.218668 | -1.162090 |
| 15            | 6             | 0           | 1.985130                | -1.179817 | -0.001791 |
| 16            | 6             | 0           | 1.803074                | -0.223244 | 1.161058  |
| 17            | 1             | 0           | 1.439570                | 1.948093  | 1.353010  |
| 18            | 1             | 0           | 1.439415                | 1.953414  | -1.345494 |
| 19            | 1             | 0           | 1.826082                | -0.522483 | -2.198381 |
| 20            | 1             | 0           | 1.249147                | -2.003511 | -0.003460 |
| 21            | 1             | 0           | 1.826064                | -0.530777 | 2.196272  |
| 22            | 1             | 0           | 2.966191                | -1.692131 | -0.002899 |

Exo Mu (H22) adduct: Sum of electronic and zero-point Energies = -1651.257767 Hartrees.

Endo Mu (H20) adduct: Sum of electronic and zero-point Energies = -1651.257413 Hartrees.

### Isotropic Fermi Contact Couplings

| Atom    | a.u.     | MegaHertz | Gauss    | 10(-4) cm-1 |
|---------|----------|-----------|----------|-------------|
| 1 C(13) | 0.00377  | 4.23520   | 1.51122  | 1.41271     |
| 2 C(13) | 0.00377  | 4.23472   | 1.51105  | 1.41255     |
| 3 C(13) | -0.00341 | -3.83320  | -1.36778 | -1.27862    |
| 4 C(13) | 0.00772  | 8.67933   | 3.09700  | 2.89511     |
| 5 C(13) | -0.00339 | -3.81355  | -1.36077 | -1.27206    |
| 6 H(1)  | -0.00022 | -0.99988  | -0.35678 | -0.33352    |

|           |          |           |          |          |
|-----------|----------|-----------|----------|----------|
| 7 H(1)    | -0.00023 | -1.01782  | -0.36318 | -0.33951 |
| 8 H(1)    | 0.00039  | 1.73792   | 0.62013  | 0.57971  |
| 9 H(1)    | -0.00043 | -1.92601  | -0.68725 | -0.64245 |
| 10 H(1)   | 0.00039  | 1.72663   | 0.61610  | 0.57594  |
| 11 Fe(57) | -0.07142 | -10.35926 | -3.69644 | -3.45548 |
| 12 C(13)  | 0.00123  | 1.37720   | 0.49142  | 0.45938  |
| 13 C(13)  | 0.00122  | 1.37708   | 0.49138  | 0.45935  |
| 14 C(13)  | 0.00081  | 0.91595   | 0.32683  | 0.30553  |
| 15 C(13)  | 0.01719  | 19.32179  | 6.89450  | 6.44506  |
| 16 C(13)  | 0.00081  | 0.91279   | 0.32571  | 0.30448  |
| 17 H(1)   | 0.00045  | 2.01883   | 0.72037  | 0.67341  |
| 18 H(1)   | 0.00045  | 2.01779   | 0.72000  | 0.67306  |
| 19 H(1)   | 0.00005  | 0.23088   | 0.08239  | 0.07701  |
| 20 H(1)   | 0.00997  | 44.58226  | 15.90806 | 14.87104 |
| 21 H(1)   | 0.00005  | 0.23282   | 0.08308  | 0.07766  |
| 22 H(1)   | 0.01621  | 72.44558  | 25.85038 | 24.16524 |

-----  
Anisotropic Spin Dipole Couplings in Principal Axis System  
-----

| Atom    | a.u. | MegaHertz | Gauss  | 10(-4) | cm-1   | Axes    |         |         |
|---------|------|-----------|--------|--------|--------|---------|---------|---------|
| 1 C(13) | Baa  | -0.0252   | -3.385 | -1.208 | -1.129 | 0.6104  | 0.1179  | 0.7833  |
|         | Bbb  | -0.0086   | -1.155 | -0.412 | -0.385 | 0.0465  | 0.9818  | -0.1840 |
|         | Bcc  | 0.0338    | 4.540  | 1.620  | 1.514  | 0.7908  | -0.1487 | -0.5938 |
| 2 C(13) | Baa  | -0.0253   | -3.392 | -1.210 | -1.131 | -0.6091 | -0.1157 | 0.7846  |
|         | Bbb  | -0.0087   | -1.167 | -0.417 | -0.389 | 0.0447  | 0.9827  | 0.1796  |
|         | Bcc  | 0.0340    | 4.559  | 1.627  | 1.521  | 0.7919  | -0.1445 | 0.5934  |
| 3 C(13) | Baa  | -0.0390   | -5.236 | -1.868 | -1.747 | 0.9709  | 0.0160  | -0.2389 |
|         | Bbb  | 0.0127    | 1.706  | 0.609  | 0.569  | -0.0473 | 0.9909  | -0.1261 |
|         | Bcc  | 0.0263    | 3.530  | 1.260  | 1.178  | 0.2347  | 0.1337  | 0.9628  |
| 4 C(13) | Baa  | -0.0462   | -6.198 | -2.212 | -2.068 | -0.0002 | 0.0008  | 1.0000  |
|         | Bbb  | -0.0403   | -5.403 | -1.928 | -1.802 | -0.2806 | 0.9598  | -0.0008 |
|         | Bcc  | 0.0865    | 11.602 | 4.140  | 3.870  | 0.9598  | 0.2806  | 0.0000  |
| 5 C(13) | Baa  | -0.0388   | -5.213 | -1.860 | -1.739 | 0.9707  | 0.0152  | 0.2398  |
|         | Bbb  | 0.0126    | 1.696  | 0.605  | 0.566  | -0.0463 | 0.9912  | 0.1244  |
|         | Bcc  | 0.0262    | 3.517  | 1.255  | 1.173  | -0.2358 | -0.1318 | 0.9628  |
| 6 H(1)  | Baa  | -0.0063   | -3.344 | -1.193 | -1.115 | 0.5778  | -0.0794 | 0.8123  |
|         | Bbb  | -0.0058   | -3.072 | -1.096 | -1.025 | 0.5275  | 0.7959  | -0.2974 |
|         | Bcc  | 0.0120    | 6.416  | 2.289  | 2.140  | 0.6229  | -0.6003 | -0.5017 |
| 7 H(1)  | Baa  | -0.0063   | -3.349 | -1.195 | -1.117 | -0.5659 | 0.1005  | 0.8183  |
|         | Bbb  | -0.0058   | -3.074 | -1.097 | -1.025 | 0.5410  | 0.7942  | 0.2765  |
|         | Bcc  | 0.0120    | 6.423  | 2.292  | 2.143  | 0.6221  | -0.5992 | 0.5038  |
|         | Baa  | -0.0077   | -4.105 | -1.465 | -1.369 | 0.7524  | -0.1949 | -0.6292 |

|           |     |         |         |        |        |         |         |         |
|-----------|-----|---------|---------|--------|--------|---------|---------|---------|
| 8 H(1)    | Bbb | -0.0028 | -1.478  | -0.527 | -0.493 | 0.0241  | 0.9627  | -0.2694 |
|           | Bcc | 0.0105  | 5.583   | 1.992  | 1.862  | 0.6583  | 0.1875  | 0.7291  |
|           | Baa | -0.0111 | -5.905  | -2.107 | -1.970 | -0.0005 | 0.0021  | 1.0000  |
| 9 H(1)    | Bbb | -0.0033 | -1.741  | -0.621 | -0.581 | 0.8093  | -0.5873 | 0.0017  |
|           | Bcc | 0.0143  | 7.646   | 2.728  | 2.550  | 0.5873  | 0.8093  | -0.0014 |
|           | Baa | -0.0077 | -4.104  | -1.464 | -1.369 | 0.7526  | -0.1923 | 0.6298  |
| 10 H(1)   | Bbb | -0.0028 | -1.482  | -0.529 | -0.494 | 0.0230  | 0.9635  | 0.2667  |
|           | Bcc | 0.0105  | 5.586   | 1.993  | 1.863  | -0.6581 | -0.1862 | 0.7296  |
|           | Baa | -1.0140 | -17.555 | -6.264 | -5.856 | 0.0029  | -0.0007 | 1.0000  |
| 11 Fe(57) | Bbb | -0.9722 | -16.832 | -6.006 | -5.614 | 0.9035  | 0.4286  | -0.0023 |
|           | Bcc | 1.9862  | 34.387  | 12.270 | 11.470 | -0.4286 | 0.9035  | 0.0018  |
|           | Baa | -0.0355 | -4.762  | -1.699 | -1.588 | 0.9470  | 0.0355  | -0.3192 |
| 12 C(13)  | Bbb | 0.0080  | 1.070   | 0.382  | 0.357  | -0.2499 | 0.7057  | -0.6630 |
|           | Bcc | 0.0275  | 3.691   | 1.317  | 1.231  | 0.2017  | 0.7077  | 0.6771  |
|           | Baa | -0.0355 | -4.760  | -1.698 | -1.588 | 0.9471  | 0.0342  | 0.3192  |
| 13 C(13)  | Bbb | 0.0080  | 1.070   | 0.382  | 0.357  | -0.2498 | 0.7028  | 0.6660  |
|           | Bcc | 0.0275  | 3.690   | 1.317  | 1.231  | 0.2016  | 0.7105  | -0.6742 |
|           | Baa | -0.0325 | -4.367  | -1.558 | -1.457 | 0.5953  | 0.7858  | 0.1677  |
| 14 C(13)  | Bbb | 0.0026  | 0.348   | 0.124  | 0.116  | 0.0454  | -0.2413 | 0.9694  |
|           | Bcc | 0.0300  | 4.019   | 1.434  | 1.341  | 0.8022  | -0.5695 | -0.1793 |
|           | Baa | -0.0190 | -2.554  | -0.912 | -0.852 | -0.0004 | -0.0023 | 1.0000  |
| 15 C(13)  | Bbb | -0.0105 | -1.407  | -0.502 | -0.469 | 0.0900  | 0.9959  | 0.0023  |
|           | Bcc | 0.0295  | 3.961   | 1.414  | 1.321  | 0.9959  | -0.0900 | 0.0002  |
|           | Baa | -0.0325 | -4.363  | -1.557 | -1.455 | 0.5956  | 0.7862  | -0.1651 |
| 16 C(13)  | Bbb | 0.0026  | 0.348   | 0.124  | 0.116  | -0.0461 | 0.2386  | 0.9700  |
|           | Bcc | 0.0299  | 4.015   | 1.433  | 1.339  | 0.8020  | -0.5701 | 0.1784  |
|           | Baa | -0.0081 | -4.302  | -1.535 | -1.435 | 0.7898  | -0.3120 | -0.5281 |
| 17 H(1)   | Bbb | -0.0039 | -2.073  | -0.740 | -0.691 | 0.2210  | -0.6584 | 0.7195  |
|           | Bcc | 0.0119  | 6.375   | 2.275  | 2.127  | 0.5722  | 0.6850  | 0.4510  |
|           | Baa | -0.0081 | -4.302  | -1.535 | -1.435 | 0.7898  | -0.3141 | 0.5268  |
| 18 H(1)   | Bbb | -0.0039 | -2.074  | -0.740 | -0.692 | -0.2209 | 0.6555  | 0.7221  |
|           | Bcc | 0.0119  | 6.376   | 2.275  | 2.127  | 0.5721  | 0.6868  | -0.4484 |
|           | Baa | -0.0076 | -4.080  | -1.456 | -1.361 | 0.6318  | 0.6623  | 0.4027  |
| 19 H(1)   | Bbb | -0.0042 | -2.259  | -0.806 | -0.754 | -0.4680 | 0.7401  | -0.4829 |
|           | Bcc | 0.0119  | 6.339   | 2.262  | 2.114  | -0.6179 | 0.1167  | 0.7776  |
|           | Baa | -0.0164 | -8.745  | -3.120 | -2.917 | 0.0001  | -0.0016 | 1.0000  |
| 20 H(1)   | Bbb | -0.0073 | -3.874  | -1.382 | -1.292 | 0.8539  | 0.5204  | 0.0007  |
|           | Bcc | 0.0237  | 12.619  | 4.503  | 4.209  | -0.5204 | 0.8539  | 0.0015  |
|           | Baa | -0.0076 | -4.080  | -1.456 | -1.361 | 0.6321  | 0.6632  | -0.4007 |
| 21 H(1)   | Bbb | -0.0042 | -2.260  | -0.806 | -0.754 | -0.4674 | 0.7388  | 0.4854  |
|           | Bcc | 0.0119  | 6.339   | 2.262  | 2.115  | 0.6180  | -0.1195 | 0.7770  |
|           | Baa | -0.0042 | -2.245  | -0.801 | -0.749 | -0.0008 | -0.0031 | 1.0000  |

|         |     |         |        |        |        |        |         |         |
|---------|-----|---------|--------|--------|--------|--------|---------|---------|
| 22 H(1) | Bbb | -0.0040 | -2.125 | -0.758 | -0.709 | 0.4684 | 0.8835  | 0.0031  |
|         | Bcc | 0.0082  | 4.370  | 1.559  | 1.458  | 0.8835 | -0.4684 | -0.0008 |

---

## H/Mu addition at Cp ring with planar C<sub>5</sub>H<sub>5</sub>Mu ring and staggered Cp rings

| Center Number | Atomic Number | Atomic Type | Coordinates (Angstroms) |           |           |
|---------------|---------------|-------------|-------------------------|-----------|-----------|
|               |               |             | X                       | Y         | Z         |
| 1             | 6             | 0           | -1.922362               | 1.136098  | 0.007573  |
| 2             | 6             | 0           | -1.812028               | 0.311972  | -1.138602 |
| 3             | 6             | 0           | -1.730793               | -1.050291 | -0.715453 |
| 4             | 6             | 0           | -1.731049               | -1.059478 | 0.702340  |
| 5             | 6             | 0           | -1.811966               | 0.296887  | 1.143075  |
| 6             | 1             | 0           | -1.992701               | 2.212597  | 0.014645  |
| 7             | 1             | 0           | -1.818650               | 0.650300  | -2.163689 |
| 8             | 1             | 0           | -1.691347               | -1.911050 | -1.365212 |
| 9             | 1             | 0           | -1.692260               | -1.928686 | 1.340825  |
| 10            | 1             | 0           | -1.817811               | 0.622081  | 2.172411  |
| 11            | 26            | 0           | -0.003015               | -0.016063 | -0.000133 |
| 12            | 6             | 0           | 1.546759                | 1.094284  | 0.718989  |
| 13            | 6             | 0           | 1.546825                | 1.097076  | -0.714658 |
| 14            | 6             | 0           | 1.811726                | -0.203139 | -1.162030 |
| 15            | 6             | 0           | 2.006391                | -1.161796 | -0.001770 |
| 16            | 6             | 0           | 1.811632                | -0.207740 | 1.161357  |
| 17            | 1             | 0           | 1.418078                | 1.958916  | 1.352339  |
| 18            | 1             | 0           | 1.418376                | 1.964188  | -1.344654 |
| 19            | 1             | 0           | 1.839004                | -0.506244 | -2.198414 |
| 20            | 1             | 0           | 1.288262                | -1.999136 | -0.003608 |
| 21            | 1             | 0           | 1.838407                | -0.514638 | 2.196648  |
| 22            | 1             | 0           | 2.998234                | -1.653924 | -0.002760 |

Exo Mu (H22) adduct: Sum of electronic and zero-point Energies = -1651.257669 Hartrees.

Endo Mu (H20) adduct: Sum of electronic and zero-point Energies = -1651.257215 Hartrees.

### Isotropic Fermi Contact Couplings

| Atom    | a.u.     | MegaHertz | Gauss    | 10(-4) cm-1 |
|---------|----------|-----------|----------|-------------|
| 1 C(13) | 0.00412  | 4.63599   | 1.65424  | 1.54640     |
| 2 C(13) | 0.00144  | 1.61525   | 0.57636  | 0.53879     |
| 3 C(13) | 0.00144  | 1.61456   | 0.57612  | 0.53856     |
| 4 C(13) | 0.00157  | 1.76196   | 0.62871  | 0.58773     |
| 5 C(13) | 0.00137  | 1.54234   | 0.55034  | 0.51447     |
| 6 H(1)  | 0.00002  | 0.10088   | 0.03600  | 0.03365     |
| 7 H(1)  | -0.00010 | -0.46055  | -0.16433 | -0.15362    |

|           |          |          |          |          |
|-----------|----------|----------|----------|----------|
| 8 H(1)    | 0.00021  | 0.93784  | 0.33465  | 0.31283  |
| 9 H(1)    | 0.00020  | 0.90494  | 0.32291  | 0.30186  |
| 10 H(1)   | -0.00010 | -0.42619 | -0.15208 | -0.14216 |
| 11 Fe(57) | -0.06054 | -8.78084 | -3.13322 | -2.92897 |
| 12 C(13)  | 0.00150  | 1.69008  | 0.60306  | 0.56375  |
| 13 C(13)  | 0.00150  | 1.68583  | 0.60155  | 0.56233  |
| 14 C(13)  | -0.00027 | -0.30693 | -0.10952 | -0.10238 |
| 15 C(13)  | 0.01815  | 20.40870 | 7.28233  | 6.80761  |
| 16 C(13)  | -0.00028 | -0.31035 | -0.11074 | -0.10352 |
| 17 H(1)   | 0.00049  | 2.20646  | 0.78732  | 0.73600  |
| 18 H(1)   | 0.00049  | 2.20115  | 0.78543  | 0.73422  |
| 19 H(1)   | 0.00030  | 1.34020  | 0.47822  | 0.44704  |
| 20 H(1)   | 0.00802  | 35.83231 | 12.78586 | 11.95237 |
| 21 H(1)   | 0.00030  | 1.34617  | 0.48035  | 0.44904  |
| 22 H(1)   | 0.01372  | 61.31742 | 21.87958 | 20.45329 |

-----  
Anisotropic Spin Dipole Couplings in Principal Axis System  
-----

| Atom    | a.u. | MegaHertz | Gauss  | 10(-4) cm-1 | Axes                          |
|---------|------|-----------|--------|-------------|-------------------------------|
| 1 C(13) | Baa  | -0.0183   | -2.452 | -0.875      | -0.818 0.6795 0.7336 0.0145   |
|         | Bbb  | -0.0083   | -1.120 | -0.400      | -0.374 -0.0038 -0.0162 0.9999 |
|         | Bcc  | 0.0266    | 3.572  | 1.275       | 1.192 0.7337 -0.6794 -0.0083  |
| 2 C(13) | Baa  | -0.0218   | -2.925 | -1.044      | -0.976 -0.6934 0.1617 0.7022  |
|         | Bbb  | -0.0037   | -0.492 | -0.176      | -0.164 0.0053 0.9756 -0.2194  |
|         | Bcc  | 0.0255    | 3.417  | 1.219       | 1.140 0.7205 0.1484 0.6773    |
| 3 C(13) | Baa  | -0.0195   | -2.617 | -0.934      | -0.873 0.6814 -0.4133 -0.6040 |
|         | Bbb  | -0.0093   | -1.254 | -0.447      | -0.418 -0.1473 0.7309 -0.6664 |
|         | Bcc  | 0.0288    | 3.871  | 1.381       | 1.291 0.7169 0.5431 0.4372    |
| 4 C(13) | Baa  | -0.0195   | -2.612 | -0.932      | -0.871 0.6665 -0.4265 0.6115  |
|         | Bbb  | -0.0100   | -1.343 | -0.479      | -0.448 -0.1508 0.7261 0.6708  |
|         | Bcc  | 0.0295    | 3.955  | 1.411       | 1.319 0.7301 0.5393 -0.4196   |
| 5 C(13) | Baa  | -0.0217   | -2.911 | -1.039      | -0.971 0.6985 -0.1646 0.6964  |
|         | Bbb  | -0.0034   | -0.461 | -0.165      | -0.154 0.0070 0.9747 0.2234   |
|         | Bcc  | 0.0251    | 3.372  | 1.203       | 1.125 0.7155 0.1512 -0.6820   |
| 6 H(1)  | Baa  | -0.0065   | -3.453 | -1.232      | -1.152 0.7366 0.6763 0.0054   |
|         | Bbb  | -0.0051   | -2.746 | -0.980      | -0.916 -0.0003 -0.0077 1.0000 |
|         | Bcc  | 0.0116    | 6.199  | 2.212       | 2.068 -0.6763 0.7366 0.0054   |
| 7 H(1)  | Baa  | -0.0067   | -3.549 | -1.266      | -1.184 0.7876 0.1445 -0.5990  |
|         | Bbb  | -0.0056   | -2.987 | -1.066      | -0.996 0.0172 0.9666 0.2557   |
|         | Bcc  | 0.0122    | 6.535  | 2.332       | 2.180 0.6159 -0.2117 0.7589   |
| 8 H(1)  | Baa  | -0.0066   | -3.535 | -1.261      | -1.179 -0.4559 0.8010 -0.3879 |
|         | Bbb  | -0.0058   | -3.095 | -1.104      | -1.032 -0.6315 0.0159 0.7752  |

|           |     |         |         |        |        |         |         |         |
|-----------|-----|---------|---------|--------|--------|---------|---------|---------|
|           | Bcc | 0.0124  | 6.630   | 2.366  | 2.212  | 0.6271  | 0.5984  | 0.4986  |
|           | Baa | -0.0067 | -3.560  | -1.270 | -1.187 | -0.4070 | 0.7910  | 0.4567  |
| 9 H(1)    | Bbb | -0.0058 | -3.089  | -1.102 | -1.030 | 0.6647  | -0.0864 | 0.7421  |
|           | Bcc | 0.0125  | 6.648   | 2.372  | 2.218  | 0.6265  | 0.6056  | -0.4906 |
|           | Baa | -0.0067 | -3.559  | -1.270 | -1.187 | 0.7874  | 0.1452  | 0.5991  |
| 10 H(1)   | Bbb | -0.0056 | -2.968  | -1.059 | -0.990 | 0.0107  | 0.9685  | -0.2489 |
|           | Bcc | 0.0122  | 6.527   | 2.329  | 2.177  | -0.6163 | 0.2024  | 0.7610  |
|           | Baa | -1.0475 | -18.134 | -6.471 | -6.049 | 0.9050  | 0.4253  | 0.0051  |
| 11 Fe(57) | Bbb | -0.9939 | -17.207 | -6.140 | -5.740 | -0.0038 | -0.0039 | 1.0000  |
|           | Bcc | 2.0413  | 35.341  | 12.611 | 11.789 | -0.4253 | 0.9050  | 0.0019  |
|           | Baa | -0.0363 | -4.871  | -1.738 | -1.625 | 0.9294  | 0.0627  | -0.3636 |
| 12 C(13)  | Bbb | 0.0079  | 1.064   | 0.380  | 0.355  | -0.2884 | 0.7383  | -0.6098 |
|           | Bcc | 0.0284  | 3.807   | 1.359  | 1.270  | 0.2302  | 0.6716  | 0.7042  |
|           | Baa | -0.0363 | -4.869  | -1.737 | -1.624 | 0.9294  | 0.0610  | 0.3640  |
| 13 C(13)  | Bbb | 0.0079  | 1.063   | 0.379  | 0.355  | -0.2883 | 0.7356  | 0.6130  |
|           | Bcc | 0.0284  | 3.806   | 1.358  | 1.269  | -0.2303 | -0.6747 | 0.7013  |
|           | Baa | -0.0403 | -5.401  | -1.927 | -1.802 | 0.7578  | 0.6359  | 0.1459  |
| 14 C(13)  | Bbb | 0.0123  | 1.651   | 0.589  | 0.551  | 0.0697  | -0.3012 | 0.9510  |
|           | Bcc | 0.0279  | 3.750   | 1.338  | 1.251  | -0.6487 | 0.7105  | 0.2726  |
|           | Baa | -0.0186 | -2.495  | -0.890 | -0.832 | -0.0005 | -0.0023 | 1.0000  |
| 15 C(13)  | Bbb | -0.0104 | -1.401  | -0.500 | -0.467 | 0.1209  | 0.9927  | 0.0023  |
|           | Bcc | 0.0290  | 3.896   | 1.390  | 1.300  | 0.9927  | -0.1209 | 0.0003  |
|           | Baa | -0.0403 | -5.404  | -1.928 | -1.803 | 0.7585  | 0.6357  | -0.1432 |
| 16 C(13)  | Bbb | 0.0123  | 1.656   | 0.591  | 0.552  | -0.0706 | 0.2987  | 0.9517  |
|           | Bcc | 0.0279  | 3.748   | 1.338  | 1.250  | -0.6478 | 0.7118  | -0.2714 |
|           | Baa | -0.0084 | -4.500  | -1.606 | -1.501 | 0.7887  | -0.3133 | -0.5289 |
| 17 H(1)   | Bbb | -0.0041 | -2.180  | -0.778 | -0.727 | 0.2198  | -0.6597 | 0.7187  |
|           | Bcc | 0.0125  | 6.680   | 2.384  | 2.228  | 0.5741  | 0.6831  | 0.4515  |
|           | Baa | -0.0084 | -4.499  | -1.605 | -1.501 | 0.7886  | -0.3154 | 0.5279  |
| 18 H(1)   | Bbb | -0.0041 | -2.181  | -0.778 | -0.728 | -0.2200 | 0.6569  | 0.7212  |
|           | Bcc | 0.0125  | 6.680   | 2.384  | 2.228  | 0.5742  | 0.6849  | -0.4486 |
|           | Baa | -0.0080 | -4.293  | -1.532 | -1.432 | 0.6669  | 0.5513  | 0.5013  |
| 19 H(1)   | Bbb | -0.0034 | -1.814  | -0.647 | -0.605 | -0.3588 | 0.8272  | -0.4324 |
|           | Bcc | 0.0114  | 6.107   | 2.179  | 2.037  | -0.6531 | 0.1085  | 0.7495  |
|           | Baa | -0.0163 | -8.712  | -3.109 | -2.906 | 0.0001  | -0.0016 | 1.0000  |
| 20 H(1)   | Bbb | -0.0082 | -4.354  | -1.554 | -1.452 | 0.8407  | 0.5415  | 0.0008  |
|           | Bcc | 0.0245  | 13.067  | 4.662  | 4.359  | -0.5415 | 0.8407  | 0.0015  |
|           | Baa | -0.0080 | -4.293  | -1.532 | -1.432 | 0.6672  | 0.5524  | -0.4996 |
| 21 H(1)   | Bbb | -0.0034 | -1.813  | -0.647 | -0.605 | -0.3582 | 0.8261  | 0.4350  |
|           | Bcc | 0.0114  | 6.106   | 2.179  | 2.037  | 0.6531  | -0.1113 | 0.7491  |
|           | Baa | -0.0043 | -2.283  | -0.815 | -0.761 | -0.0002 | -0.0019 | 1.0000  |
| 22 H(1)   | Bbb | -0.0040 | -2.121  | -0.757 | -0.708 | 0.4392  | 0.8984  | 0.0018  |

Bcc 0.0083 4.404 1.572 1.469 0.8984 -0.4392 -0.0007

---



## H/Mu addition at the iron with eclipsed Cp rings

| Center Number | Atomic Number | Atomic Type | Coordinates (Angstroms) |           |           |
|---------------|---------------|-------------|-------------------------|-----------|-----------|
|               |               |             | X                       | Y         | Z         |
| 1             | 6             | 0           | 1.659978                | 1.084100  | 0.708329  |
| 2             | 6             | 0           | 1.842357                | -0.262826 | 1.143743  |
| 3             | 6             | 0           | 2.017585                | -1.071624 | -0.011917 |
| 4             | 6             | 0           | 1.831886                | -0.244727 | -1.152672 |
| 5             | 6             | 0           | 1.654675                | 1.095439  | -0.694451 |
| 6             | 1             | 0           | 1.498940                | 1.934506  | 1.352385  |
| 7             | 1             | 0           | 1.909904                | -0.597178 | 2.166878  |
| 8             | 1             | 0           | 2.237674                | -2.126564 | -0.021286 |
| 9             | 1             | 0           | 1.888578                | -0.563191 | -2.181547 |
| 10            | 1             | 0           | 1.487461                | 1.955886  | -1.323365 |
| 11            | 26            | 0           | 0.000158                | -0.256596 | 0.003607  |
| 12            | 6             | 0           | -1.660208               | 1.084515  | 0.707636  |
| 13            | 6             | 0           | -1.842348               | -0.262145 | 1.143927  |
| 14            | 6             | 0           | -2.017519               | -1.071756 | -0.011130 |
| 15            | 6             | 0           | -1.832012               | -0.245592 | -1.152432 |
| 16            | 6             | 0           | -1.654918               | 1.094892  | -0.695134 |
| 17            | 1             | 0           | -1.499254               | 1.935383  | 1.351103  |
| 18            | 1             | 0           | -1.909845               | -0.595838 | 2.167283  |
| 19            | 1             | 0           | -2.237588               | -2.126706 | -0.019799 |
| 20            | 1             | 0           | -1.888773               | -0.564710 | -2.181101 |
| 21            | 1             | 0           | -1.487874               | 1.954944  | -1.324635 |
| 22            | 1             | 0           | -0.000200               | -1.736698 | 0.004922  |

Mu (H22) adduct: Sum of electronic and zero-point Energies = -1651.255478 Hartrees.

### Isotropic Fermi Contact Couplings

| Atom    | a.u.     | MegaHertz | Gauss    | 10(-4) cm-1 |
|---------|----------|-----------|----------|-------------|
| 1 C(13) | 0.01028  | 11.55749  | 4.12400  | 3.85517     |
| 2 C(13) | -0.00284 | -3.18993  | -1.13825 | -1.06405    |
| 3 C(13) | 0.00517  | 5.81017   | 2.07321  | 1.93806     |
| 4 C(13) | -0.00296 | -3.32513  | -1.18649 | -1.10914    |
| 5 C(13) | 0.01061  | 11.93259  | 4.25784  | 3.98028     |
| 6 H(1)  | -0.00078 | -3.48270  | -1.24271 | -1.16170    |
| 7 H(1)  | 0.00017  | 0.77530   | 0.27665  | 0.25861     |
| 8 H(1)  | -0.00100 | -4.46717  | -1.59400 | -1.49009    |
| 9 H(1)  | 0.00019  | 0.84881   | 0.30288  | 0.28313     |

|           |          |           |           |           |
|-----------|----------|-----------|-----------|-----------|
| 10 H(1)   | -0.00082 | -3.68213  | -1.31387  | -1.22823  |
| 11 Fe(57) | -0.17152 | -24.87756 | -8.87693  | -8.29826  |
| 12 C(13)  | 0.01029  | 11.56991  | 4.12843   | 3.85931   |
| 13 C(13)  | -0.00285 | -3.20263  | -1.14278  | -1.06828  |
| 14 C(13)  | 0.00518  | 5.82721   | 2.07929   | 1.94375   |
| 15 C(13)  | -0.00296 | -3.32448  | -1.18626  | -1.10893  |
| 16 C(13)  | 0.01060  | 11.91401  | 4.25121   | 3.97408   |
| 17 H(1)   | -0.00078 | -3.49647  | -1.24763  | -1.16630  |
| 18 H(1)   | 0.00017  | 0.78063   | 0.27855   | 0.26039   |
| 19 H(1)   | -0.00100 | -4.47732  | -1.59762  | -1.49347  |
| 20 H(1)   | 0.00019  | 0.84798   | 0.30258   | 0.28286   |
| 21 H(1)   | -0.00082 | -3.67757  | -1.31225  | -1.22671  |
| 22 H(1)   | -0.02160 | -96.57010 | -34.45861 | -32.21232 |

-----  
Anisotropic Spin Dipole Couplings in Principal Axis System  
-----

| Atom    | a.u. | MegaHertz | Gauss  | 10(-4) cm-1 | Axes                          |
|---------|------|-----------|--------|-------------|-------------------------------|
| 1 C(13) | Baa  | -0.0396   | -5.313 | -1.896      | -1.772 -0.1702 -0.3239 0.9306 |
|         | Bbb  | -0.0353   | -4.737 | -1.690      | -1.580 -0.3655 0.8978 0.2457  |
|         | Bcc  | 0.0749    | 10.050 | 3.586       | 3.352 0.9151 0.2983 0.2712    |
| 2 C(13) | Baa  | -0.0303   | -4.072 | -1.453      | -1.358 0.9261 0.0107 -0.3772  |
|         | Bbb  | 0.0100    | 1.340  | 0.478       | 0.447 -0.0482 0.9948 -0.0901  |
|         | Bcc  | 0.0204    | 2.731  | 0.975       | 0.911 0.3743 0.1016 0.9217    |
| 3 C(13) | Baa  | -0.0381   | -5.116 | -1.825      | -1.706 0.0089 0.0014 1.0000   |
|         | Bbb  | -0.0304   | -4.084 | -1.457      | -1.362 0.0498 0.9988 -0.0018  |
|         | Bcc  | 0.0686    | 9.200  | 3.283       | 3.069 0.9987 -0.0498 -0.0088  |
| 4 C(13) | Baa  | -0.0309   | -4.146 | -1.479      | -1.383 0.9342 0.0213 0.3560   |
|         | Bbb  | 0.0105    | 1.408  | 0.502       | 0.470 -0.0488 0.9965 0.0683   |
|         | Bcc  | 0.0204    | 2.738  | 0.977       | 0.913 -0.3533 -0.0812 0.9320  |
| 5 C(13) | Baa  | -0.0413   | -5.539 | -1.976      | -1.848 0.1540 0.3427 0.9267   |
|         | Bbb  | -0.0369   | -4.954 | -1.768      | -1.652 -0.3672 0.8906 -0.2683 |
|         | Bcc  | 0.0782    | 10.492 | 3.744       | 3.500 0.9173 0.2990 -0.2630   |
| 6 H(1)  | Baa  | -0.0091   | -4.880 | -1.741      | -1.628 0.1852 -0.6761 0.7132  |
|         | Bbb  | -0.0038   | -2.043 | -0.729      | -0.682 0.8886 -0.1947 -0.4153 |
|         | Bcc  | 0.0130    | 6.924  | 2.471       | 2.310 0.4196 0.7106 0.5648    |
| 7 H(1)  | Baa  | -0.0063   | -3.371 | -1.203      | -1.124 0.7507 0.2945 -0.5914  |
|         | Bbb  | -0.0034   | -1.836 | -0.655      | -0.612 -0.1547 0.9486 0.2759  |
|         | Bcc  | 0.0098    | 5.207  | 1.858       | 1.737 0.6422 -0.1156 0.7577   |
| 8 H(1)  | Baa  | -0.0084   | -4.479 | -1.598      | -1.494 0.0047 -0.0088 1.0000  |
|         | Bbb  | -0.0042   | -2.217 | -0.791      | -0.739 0.7327 0.6805 0.0025   |
|         | Bcc  | 0.0125    | 6.695  | 2.389       | 2.233 -0.6805 0.7327 0.0097   |
|         | Baa  | -0.0064   | -3.390 | -1.210      | -1.131 0.7554 0.2823 0.5913   |

|           |     |         |         |         |         |         |         |         |
|-----------|-----|---------|---------|---------|---------|---------|---------|---------|
| 9 H(1)    | Bbb | -0.0034 | -1.797  | -0.641  | -0.599  | -0.1525 | 0.9534  | -0.2603 |
|           | Bcc | 0.0097  | 5.187   | 1.851   | 1.730   | -0.6372 | 0.1064  | 0.7633  |
|           | Baa | -0.0094 | -4.998  | -1.783  | -1.667  | -0.1712 | 0.6605  | 0.7311  |
| 10 H(1)   | Bbb | -0.0038 | -2.012  | -0.718  | -0.671  | 0.8953  | -0.2054 | 0.3953  |
|           | Bcc | 0.0131  | 7.009   | 2.501   | 2.338   | 0.4113  | 0.7222  | -0.5561 |
|           | Baa | -2.1488 | -37.202 | -13.275 | -12.409 | 0.0000  | 0.0005  | 1.0000  |
| 11 Fe(57) | Bbb | 0.9743  | 16.868  | 6.019   | 5.627   | 1.0000  | 0.0032  | 0.0000  |
|           | Bcc | 1.1745  | 20.334  | 7.256   | 6.783   | -0.0032 | 1.0000  | -0.0005 |
|           | Baa | -0.0397 | -5.327  | -1.901  | -1.777  | 0.1688  | -0.3256 | 0.9303  |
| 12 C(13)  | Bbb | -0.0354 | -4.750  | -1.695  | -1.584  | 0.3653  | 0.8973  | 0.2478  |
|           | Bcc | 0.0751  | 10.077  | 3.596   | 3.361   | 0.9155  | -0.2980 | -0.2704 |
|           | Baa | -0.0304 | -4.077  | -1.455  | -1.360  | 0.9264  | -0.0109 | 0.3763  |
| 13 C(13)  | Bbb | 0.0100  | 1.345   | 0.480   | 0.449   | 0.0481  | 0.9948  | -0.0896 |
|           | Bcc | 0.0204  | 2.732   | 0.975   | 0.911   | -0.3734 | 0.1011  | 0.9222  |
|           | Baa | -0.0382 | -5.127  | -1.829  | -1.710  | -0.0085 | 0.0014  | 1.0000  |
| 14 C(13)  | Bbb | -0.0305 | -4.093  | -1.461  | -1.365  | -0.0491 | 0.9988  | -0.0018 |
|           | Bcc | 0.0687  | 9.220   | 3.290   | 3.075   | 0.9988  | 0.0491  | 0.0084  |
|           | Baa | -0.0309 | -4.144  | -1.479  | -1.382  | 0.9341  | -0.0207 | -0.3564 |
| 15 C(13)  | Bbb | 0.0105  | 1.406   | 0.502   | 0.469   | 0.0486  | 0.9964  | 0.0695  |
|           | Bcc | 0.0204  | 2.738   | 0.977   | 0.913   | 0.3536  | -0.0822 | 0.9318  |
|           | Baa | -0.0412 | -5.533  | -1.974  | -1.846  | -0.1547 | 0.3425  | 0.9267  |
| 16 C(13)  | Bbb | -0.0369 | -4.947  | -1.765  | -1.650  | 0.3669  | 0.8908  | -0.2680 |
|           | Bcc | 0.0781  | 10.480  | 3.739   | 3.496   | 0.9173  | -0.2986 | 0.2635  |
|           | Baa | -0.0092 | -4.887  | -1.744  | -1.630  | -0.1845 | -0.6754 | 0.7140  |
| 17 H(1)   | Bbb | -0.0038 | -2.041  | -0.728  | -0.681  | 0.8889  | 0.1953  | 0.4144  |
|           | Bcc | 0.0130  | 6.927   | 2.472   | 2.311   | -0.4193 | 0.7111  | 0.5644  |
|           | Baa | -0.0063 | -3.371  | -1.203  | -1.124  | 0.7507  | -0.2942 | 0.5916  |
| 18 H(1)   | Bbb | -0.0034 | -1.833  | -0.654  | -0.611  | 0.1548  | 0.9488  | 0.2754  |
|           | Bcc | 0.0098  | 5.203   | 1.857   | 1.736   | -0.6423 | -0.1152 | 0.7578  |
|           | Baa | -0.0084 | -4.483  | -1.600  | -1.495  | -0.0046 | -0.0081 | 1.0000  |
| 19 H(1)   | Bbb | -0.0042 | -2.216  | -0.791  | -0.739  | 0.7330  | -0.6802 | -0.0021 |
|           | Bcc | 0.0126  | 6.699   | 2.390   | 2.234   | 0.6802  | 0.7330  | 0.0091  |
|           | Baa | -0.0064 | -3.389  | -1.209  | -1.131  | 0.7554  | -0.2829 | -0.5911 |
| 20 H(1)   | Bbb | -0.0034 | -1.798  | -0.641  | -0.600  | 0.1527  | 0.9532  | -0.2610 |
|           | Bcc | 0.0097  | 5.187   | 1.851   | 1.730   | 0.6373  | 0.1068  | 0.7632  |
|           | Baa | -0.0094 | -4.994  | -1.782  | -1.666  | 0.1714  | 0.6611  | 0.7305  |
| 21 H(1)   | Bbb | -0.0038 | -2.012  | -0.718  | -0.671  | 0.8952  | 0.2052  | -0.3957 |
|           | Bcc | 0.0131  | 7.006   | 2.500   | 2.337   | -0.4115 | 0.7217  | -0.5566 |
|           | Baa | -0.0514 | -27.435 | -9.789  | -9.151  | 0.0000  | 0.0009  | 1.0000  |
| 22 H(1)   | Bbb | -0.0397 | -21.191 | -7.561  | -7.069  | 1.0000  | -0.0002 | 0.0000  |
|           | Bcc | 0.0911  | 48.626  | 17.351  | 16.220  | 0.0002  | 1.0000  | -0.0009 |

---
